# Supplementary material
Source: publisher figshare collection journal article supplement (https://tandf.figshare.com/ndownloader/files/15326630)
Supplement: Supplementary file 1 [file 15326630]

**Supplementary material to**

**“Learning in participatory environmental governance – its antecedents and effects. Findings from a case survey meta-analysis“**

**Independent Variable descriptions**

| Variable Name | Description | Scale |
| --- | --- | --- |
| Power delegation to participants | Degree to which the process design provided the possibility for participants to develop and determine the output. | 0..4 |
| Communication intensity | Principal component including:   - Information provision: Degree to which participants [...] received all relevant information (i.e. actual flow of information in the direction of participants), in relation to the amount of information the process organizer had or could easily access. (mean=2.36) - Consultation: Degree to which participants [...] gave all the input they considered relevant. (mean=2.45) - Two-way dialogue: Degree to which a two-way dialogue and information flow, and direct interaction among participants and between participants and the process organizers, took place. Dialogue implies more than just extensive communication and/or consultation but requires responsive on-going interaction, so that the relevant information is exchanged (i.e. assumes the possibility to ask questions and respond to comments). (mean=2.4)” - Face-to-face: Degree to which process design provided for participants to communicate in person. (mean=2.50) |  |
| Non-state actor representation | We measure the involvement of non-state actors as the average representation of civil society actors, private business actors, and individual citizens in a given case. Representation is defined as “the extent to which the composition of participants in the process mirrors the interest constellation in the public. Full representation is reached when there are a sufficient number of representatives and when those representatives are fully accepted as such by their constituencies.” | 0..4 |
| Process duration | Duration between a first interaction/meeting with the intention of reaching a collectively binding decision, and the date of the final decision (output) that terminated the particular decision-making process. | Count (days) |
| Structured communication methods | Principal component including:   - Structural information elicitation: Degree to which the process design provided for the structured elicitation of information from stakeholders. Elicitation refers to the process of providing occasions and incentives for stakeholders to provide information. Elicitation methods can be interviews, questionnaires, agenda points with lead questions, etc. (mean=1.34) - Structural information aggregation: Degree to which the process design provided for the structured aggregation of stakeholder input (i.e. through the use of structured / facilitated aggregation methods). Aggregation refers to the process of summarising, combining and prioritising information. Aggregation methods are means of defining which opinions and information become part of decisions and which do not. Examples of aggregation methods include majority vote and selective summary of letters from the public. (mean=1.34) - Knowledge integration methods: Degree to which process design provided for different methods for knowledge integration (e.g. participatory modelling, multi‐criteria analysis). Integration of knowledge is conceived of here as the combination of different kinds of knowledge to more comprehensively inform the output. (mean=1.12) - Facilitation: Degree to which the process was characterised by skilled facilitation. A facilitator is a specialist who helps people design effective meetings and problem- solving sessions, and acts as the meeting leader on behalf of the group. A facilitator does not have the authority to make substantive decisions, but may have a say in how the meeting is run, and will consult with the group about major process decisions, such as a significant change in agenda or meeting procedures (adapted from Creighton 1998). Skilled facilitation consists of the following elements: assistance with designing meetings; helping to keep meetings on track; clarifying and accepting communication and feelings; stating problems in a constructive way; suggesting appropriate procedures or problem-solving approaches; summarising and clarifying direction; consensus-testing; managing power imbalances between participants. (mean=1.71) |  |
| Trust towards govt. and participants | Sum of pre-existing trust and trust developed during the process.  “Trust is the willingness to accept vulnerability based on positive expecta‐ tions about another’s intentions or behaviors” (McEvily et al. 2003).  Pre-existing trust (Levels of trust likely depend on the existence of a prehistory of either antagonism or cooperation between stakeholders and government sector actors. Where there is no prehistory of interaction, there is possibly (but not necessarily) neither trust nor distrust between the parties):   - Degree of general public trust in the capabilities and intentions of the government and government sector actors to act in the public interest – before the decision-making process. (mean=-0.41) - Degree of trust of stakeholders and the specific governmental actors potentially involved in the decision‐making process – before the decision-making process. (mean=-0.46) - Degree of trust among stakeholders potentially involved in the DMP – before the decision-making process. (mean=-0.31)   Trust created during process:   - Degree to which trust relationships were created or strengthened among participants (and potentially beyond), which can be expected to “facilitate coordination and cooperation for mutual benefit” (Putnam 1995: 67, see also Ansell & Gash 2008). (mean=0.80) | -8..8 |
| Diversity of interests | Shannon diversity index of interests represented in the decision-making process.  Interests include:   - Nature interests: To preserve, protect or restore the natural environment and ecosystems (including the atmosphere, biodiversity, terrestrial and aquatic habitats, and flora and fauna) largely independently of their instrumental value to humankind or to protect, preserve, enhance or restore stocks and flows of natural resources that are of instrumental value to humans, and provide for their sustainable use. (mean=1.50) - Development interests: To cause or tolerate or accept harmful effects on the environment including pollution or general degradation of the quality of the environment and its ecosystems, the endangerment of human health as well as the unsustainable utilisation of natural resources and capacities. (mean=1.35) |  |
| Diversity of sectors | Shannon diversity index of sectors represented in the decision-making process.  Sectors include:   - Government: All governmental actors and organisations at various levels engaged in the formulation of policies and their execution (i.e. involved state agencies), including quasi non‐governmental organisations fulfilling functions of government. (mean=2.25) - Private sector: All for‐profit organisations that are owned or operated by private individuals, and companies engaged in the supply of goods and services (i.e. productive private enterprises, farmers, industry, etc.), including umbrella organisations representing industry, and state‐owned enterprises that are mandated to return a profit from their commercial activity. (mean=1.47) - Civil society: A collection of entities and groups that are organised (institutionalised), non‐governmental, non‐profit, self‐governing, and voluntary (e.g. NGOs, churches, unions) (adapted from Salamon & Anheier 1997: 33f). (mean=0.96) - Lay citizens: Non‐organised individuals (e.g. consumers, residents, etc.), and ad‐hoc, temporary and issue‐related citizen initiatives. (mean=1.03) |  |
| Cooperativeness of actors | Degree of cooperativeness of all actors.  Cooperativeness is an aggregate concept describing the willingness to engage in a collaborative process, to contribute information and to reach a compromise or consensus.  Principal component including all interests:   - pro-conservation (mean=2.40); - pro-human health (mean=2.26) - pro-natural resource use (mean=2.39); - pro-exploitation (mean=1.96). |  |
| Value coflict | Degree to which there was an actual or potential conflict of values associated with the issue at stake. Consider diverging ethical, social, cultural and ideological values. Indicators include: latent conflict because of (‘objectively’) conflicting values; manifest conflict or actual dispute among stakeholders. Code the degree of conflict of values in comparison to other cases, and not in comparison to alternative potential scenarios for the same case. | 0..4 |

All variable descriptions from [ANONYMOUS].

***Communication intensity***

| *Variable* | *Factor 1*  *“Communication”* |
| --- | --- |
| Face-to-face communication | 0.92 |
| Information provision | 0.88 |
| Consultation | 0.92 |
| Two-way dialogue | 0.93 |
| *Eigenvalues* | 3.32 |
| *Per cent of variance* | 0.83 |
| *Reliability (Cronbach's alpha)* | 0.93 |

***Structured communication methods***

| *Variable* | *Factor 1*  *“Structured Communication Methods”* |
| --- | --- |
| Structural information elicitation | 0.92 |
| Structural information aggregation | 0.91 |
| Knowledge integration methods | 0.84 |
| Facilitation | 0.81 |
| *Eigenvalues* | 3.02 |
| *Per cent of variance* | 0.76 |
| *Reliability (Cronbach's alpha)* | 0.89 |

***Trust towards government and participants***

Composite variable, adding trust built up during the decision-making process to the level of pre-existing trust.

Pre-existing trust: mean value of General_Trust_Government, Trust_Government_Actors, Trust_Stakeholders (Cronbach’s Alpha=.78, mean= -0.40).

**Cooperativeness of actors**

| *Variable* | *Factor 1*  *“Cooperativeness”* |
| --- | --- |
| Cooperativeness pro-conservation interests | 0.89 |
| Cooperativeness pro-human health interests | 0.89 |
| Cooperativeness pro-natural resource use interests | 0.93 |
| Cooperativeness pro-exploitation interests | 0.76 |
| *Eigenvalues* | 3.01 |
| *Per cent of variance* | 0.75 |
| *Reliability (Cronbach's alpha)* | 0.89 |

|  | Variable | Min | Mean | SD | Max | Confidence Score1 | Correlations (Spearman’s Rho) | | | | | | | | | | | | |
| --- | --- | --- | --- | --- | --- | --- | --- | --- | --- | --- | --- | --- | --- | --- | --- | --- | --- | --- | --- |
|  | (1) | (2) | (3) | (4) | (5) | (6) | (7) | (8) | (9) | (10) | (11) | (12) | (13) |
| (1) | Environmental standard of the output | -3.36 | 0.87 | 1.33 | 3.25 | 1.51 |  |  |  |  |  |  |  |  |  |  |  |  |  |
| (2) | Learning as deliberation | 0.00 | 1.74 | 1.00 | 4.00 | 1.45 | .42 |  |  |  |  |  |  |  |  |  |  |  |  |
| (3) | Learning & capacity building | -2.25 | 0.00 | 1.00 | 2.53 | 1.39 | .39 | .61 |  |  |  |  |  |  |  |  |  |  |  |
| (4) | Learning reflected in output | 0.00 | 1.09 | 0.70 | 4.00 | 1.60 | .38 | .58 | .56 |  |  |  |  |  |  |  |  |  |  |
| (5) | Communication intensity | -2.84 | 0.00 | 1.00 | 1.77 | 1.73 | .38 | .72 | .52 | .44 |  |  |  |  |  |  |  |  |  |
| (6) | Structured communication methods | -1.50 | 0.00 | 1.00 | 2.76 | 1.31 | .35 | .66 | .59 | .63 | .62 |  |  |  |  |  |  |  |  |
| (7) | Power delegation to participants | 0.00 | 1.91 | 1.11 | 4.00 | 1.81 | .43 | .64 | .38 | .47 | .69 | .51 |  |  |  |  |  |  |  |
| (8) | Non-state actor representation | 0.00 | 1.06 | 0.51 | 2.81 | 1.61 | .17 | .35 | .43 | .36 | .42 | .43 | .26 |  |  |  |  |  |  |
| (9) | Diversity of interests | 0.00 | 0.61 | 0.16 | 0.69 | 1.63 | .00 | .08 | .06 | .04 | .11 | .11 | .14 | .22 |  |  |  |  |  |
| (10) | Diversity of sectors | 0.00 | 1.12 | 0.29 | 1.38 | 1.63 | .13 | .22 | .33 | .24 | .25 | .34 | .10 | .74 | .07 |  |  |  |  |
| (11) | Process duration (in days) | 1 | 1,389.28 | 1,542.96 | 15,707 | 2.51 | .07 | -.14 | .10 | -.03 | -.23 | -.12 | -.18 | .05 | .04 | .05 |  |  |  |
| (12) | Trust towards govt. and participants | -4.99 | 0.18 | 1.77 | 5.00 | 1.31 | .48 | .60 | .52 | .44 | .44 | .43 | .41 | .28 | -.02 | .17 | -.05 |  |  |
| (13) | Cooperativeness of actors | -2.87 | 0.00 | 0.97 | 2.38 | 1.56 | .44 | .55 | .51 | .45 | .54 | .42 | .47 | .35 | .05 | .17 | -.04 | .60 |  |
| (14) | Value conflict | 0.00 | 1.81 | 0.79 | 3.75 | 1.71 | -.15 | -.09 | -.01 | -.04 | -.08 | -.08 | -.08 | .00 | .18 | -.15 | .11 | -.32 | -.25 |

***Descriptive Statistics***

*1Note:* For composite variables, the average information reliability is calculated.

***Extended regression table***

|  | Dependent variables: | | | | | | | | |
| --- | --- | --- | --- | --- | --- | --- | --- | --- | --- |
|  | Learning as deliberation | | Learning & capacity building | | Learning reflected in output | | Environmental standard of the output | | |
| Model no. |  | (1a) | (2a) | (2b) | (3a) | (3b) | (4a) | (4b) | (4c) |
| Power delegation |  | 0.16***  (0.05) | -0.05  (0.05) | -0.08  (0.05) | 0.15***  (0.04) | 0.13**  (0.04) | 0.25**  (0.10) | 0.22*  (0.10) |  |
| Communication intensity |  | 0.31***  (0.06) | 0.11  (0.07) | 0.04  (0.07) | -0.11**  (0.05) | -0.15**  (0.05) | 0.09  (0.14) | 0.09  (0.15) |  |
| Structured communication methods | | 0.26***  (0.05) | 0.37***  (0.05) | 0.32***  (0.06) | 0.32***  (0.05) | 0.24***  (0.05) | 0.13  (0.08) | 0.03  (0.09) |  |
| Non-state actor representation |  | -0.09  (0.10) | 0.12  (0.12) | 0.14  (0.12) | 0.08  (0.09) | 0.07  (0.09) | -0.27  (0.20) | -0.28  (0.20) |  |
| Diversity of interests |  | 0.10  (0.23) | -0.24  (0.26) | -0.26  (0.26) | -0.28  (0.20) | -0.25  (0.19) | -0.80  (0.48) | -0.72  (0.49) |  |
| Diversity of sectors |  | 0.01  (0.17) | 0.13  (0.19) | 0.13  (0.19) | 0.12  (0.17) | 0.09  (0.16) | 0.24  (0.37) | 0.20  (0.38) |  |
| Process duration (log) |  | 0.03  (0.03) | 0.15***  (0.04) | 0.15***  (0.04) | 0.01  (0.03) | -0.02  (0.03) | 0.05  (0.07) | 0.04  (0.08) |  |
| Trust towards govt. and participants | | 0.14***  (0.03) | 0.13***  (0.03) | 0.10***  (0.03) | 0.05  (0.03) | 0.02  (0.03) | 0.16**  (0.06) | 0.13*  (0.06) |  |
| Cooperativeness of actors |  | 0.09  (0.05) | 0.22***  (0.07) | 0.20***  (0.06) | 0.09  (0.05) | 0.04  (0.05) | 0.26*  (0.10) | 0.23*  (0.10) |  |
| Value conflict |  | 0.08  (0.05) | 0.20***  (0.06) | 0.18***  (0.05) | 0.09*  (0.04) | 0.06  (0.04) | -0.03  (0.10) | -0.07  (0.10) |  |
| Learning as deliberation |  |  |  | 0.20***  (0.07) |  | 0.11*  (0.04) |  | 0.05  (0.10) | 0.39***  (0.09) |
| Learning & capacity building |  |  |  |  |  | 0.14**  (0.05) |  | 0.08  (0.10) | 0.17  (0.10) |
| Learning reflected in output |  |  |  |  |  |  |  | 0.18  (0.13) | 0.32*  (0.13) |
| Intercept |  | 1.14***  (0.14) | -1.40***  (0.32) | -1.63***  (0.33) | 0.53**  (0.20) | 0.62**  (0.24) | 0.51  (0.75) | 0.49  (0.78) | -0.18  (0.22) |
| Observations |  | 296 | 296 | 296 | 286 | 286 | 276 | 276 | 280 |
| R2 |  | 0.67 | 0.54 | 0.56 | 0.46 | 0.49 | 0.34 | 0.35 | 0.25 |
| Adjusted R2 |  | 0.66 | 0.53 | 0.54 | 0.44 | 0.47 | 0.32 | 0.32 | 0.24 |
| Residual Std. Error |  | 0.59 (df=285) | 0.69 (df=285) | 0.68 (df=284) | 0.53 (df=275) | 0.51 (df=273) | 1.10 (df=265) | 1.10 (df=262) | 1.16 (df=276) |
| F-value |  | 57.04*** | 33.70*** | 32.23*** | 23.25*** | 21.69*** | 13.65*** | 10.77*** | 30.45*** |
| AIC |  | 538.09 | 629.71 | 622.92 | 457.08 | 444.84 | 849.54 | 852.06 | 882.05 |

Note: Regression coefficients with standard errors in brackets. Models 3a to 4c report robust standard errors (Huber-White). Statistical significance is depicted as * p<.05; **p<.01; *** p<.001.

**Model comparisons**

(2a) vs. (2b): (2b) has significantly better model fit, *F(1,284)=8.56, p=.004.*

(3a) vs. (3b): (3b) has significantly better model fit, *F(2,273)=7.98, p<.001.*

(4a) vs. (4b): (4b) has no significantly better model fit, *F(3,262)=1.11, p=.35.*

***Diagnostics for main models***

The following displays for each full model some model diagnostics, analyzing whether the models meet assumptions of multicollinearity, homogeneity of variance (homoscedasticity), normality, linearity, and the influence of outliers. Used criteria are:

Multicollinearity – VIF < 4

Homoscedasticity – Breusch-Pagan test is non-significant

Outliers – Bonferroni p-values of studentized residuals non-significant

Normality – graphical inspection (points should remain within dotted lines)

Linearity – graphical inspection (inspection for strongly non-linear components)

**Model (1a)**

Multicollinearity: VIF < 2.97

Homoscedasticity (Breusch-Pagan test): p=.79

Outliers (Bonferroni p-values of studentized residuals): p=.17

Normality:

Linearity

**Model (2b)**

Multicollinearity: VIF < 3.26

Homoscedasticity (Breusch-Pagan test): p=.19

Outliers (Bonferroni p-values of studentized residuals): p=.20

Normality:

Linearity:

**Model (3b)**

Multicollinearity: VIF < 3.46

Homoscedasticity (Breusch-Pagan test): p<.01 => Potentially problematic

Hence, robust Huber-White sandwich estimators for standard errors.

Outliers (Bonferroni p-values of studentized residuals): p<.01 => Potentially problematic

Closer inspection:

- Number of cases with large residuals (standardized residuals > abs(2)): 10, i.e. below 5%, as expected
- Two cases with standardized residuals >3
- However, Cook’s distance <0.13, hence, no influential case
- Leverage < 0.15 (average for the model (k+1/n = 13/286 = 0.45), i.e. no high-leverage points
- Given these diagnostics, outliers should not be a problem for the model

Normality:

Linearity:

**Model (4b)**

Multicollinearity: VIF < 3.47

Homoscedasticity (Breusch-Pagan test): p<.01 => Potentially Problematic

Hence, robust Huber-White sandwich estimators for standard errors.

Outliers (Bonferroni p-values of studentized residuals): p=.49

Normality:

Linearity:
